# Supplementary material
Source: PubMed Central journal article supplement (PMC4530060)
Supplement: NIHMS698297-supplement-1.pdf [file NIHMS698297-supplement-1.pdf]

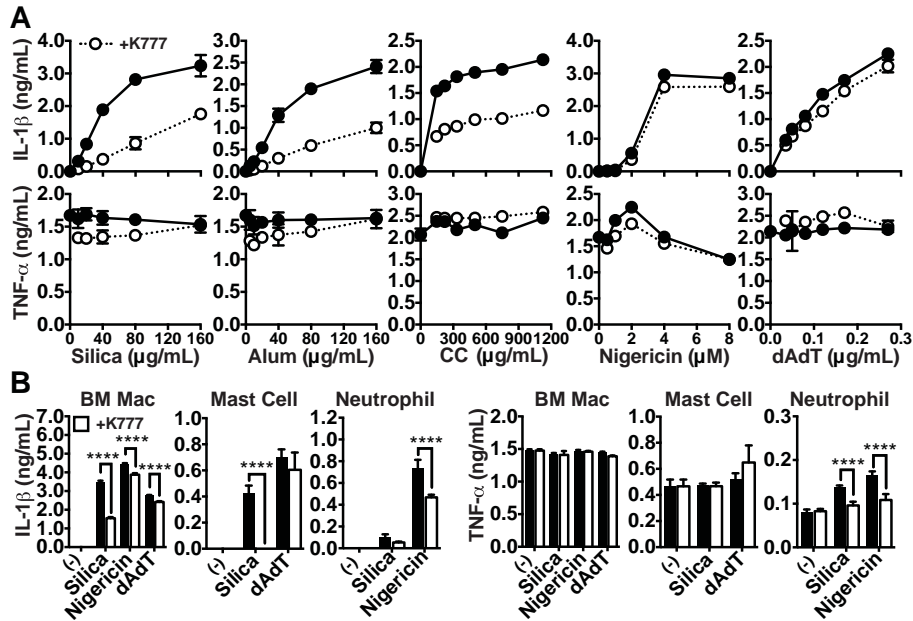

## Supplemental Figure 1

### Supplemental Figure 1

(A) LPS-primed PMs were treated with media control (solid line) or K777 (+K777/dashed line; 15-20  $\mu$ M) and then stimulated with the indicated concentrations of silica, alum, CC, nigericin or dAdT; IL-1 $\beta$  (upper graphs) and TNF- $\alpha$  (lower graphs) were measured in supernatants. (B) LPS-primed bone marrow-derived macrophages (BM Mac), mast cells, or neutrophils were treated with media control (black bars) or K777 (+K777/white bars; 15  $\mu$ M) and then stimulated with media control (-), silica (40  $\mu$ g/mL; 100  $\mu$ g/mL for neutrophils), nigericin (2  $\mu$ M for BM Macs; 1  $\mu$ M for neutrophils) and/or dAdT (0.3  $\mu$ g/mL); IL-1 $\beta$  (graphs on left) and TNF- $\alpha$  (graphs on right) were measured in supernatants. Error bars represent (A) S.D. from technical triplicates (CC and dAdT) or range bars of technical duplicates (silica, alum and nigericin), (B) S.D. from technical triplicates (BM Mac for silica or nigericin; mast cells and neutrophils) or range bars from technical duplicates (BM Mac for dAdT). Statistical analysis was performed by (B) Two-way ANOVA and Sidak's multiple comparisons test; \*\*\*\*P<0.0001. All data are representative of at least three independent experiments.

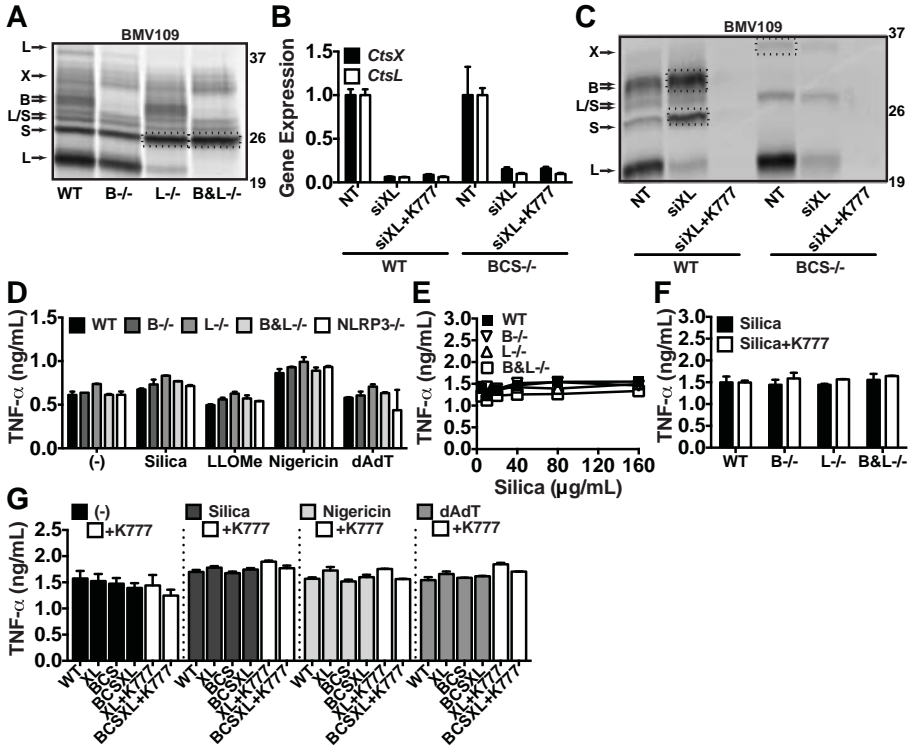

## Supplemental Figure 2

### Supplemental Figure 2

(A,D-F) Lethally irradiated WT mice were reconstituted with bone marrow from WT, cathepsin B (B<sup>-/-</sup>), L (L<sup>-/-</sup>), B and L (B&L<sup>-/-</sup>), or NLRP3 (NLRP3<sup>-/-</sup>) deficient donor mice. PMs elicited from these mice were LPS-primed and (A) probed for cathepsin activity with BMV109 in live cells; lysates were processed by SDS-PAGE and phosphor imaged; dashed boxes highlight upregulated cathepsin S activity for L<sup>-/-</sup> & B&L<sup>-/-</sup> and m.w. markers are on the right in kDa, (D) stimulated with media control (-), silica (40  $\mu$ g/mL), LLOMe (0.75 mM), nigericin (2  $\mu$ M), or dAdT (0.4  $\mu$ g/mL), (E) stimulated with a range of silica concentrations, or (F) stimulated with silica plus media (black bars) or silica plus K777 (white bars; 20  $\mu$ M). (B,C,G) PMs elicited from WT or mice deficient in the three cathepsins B, C and S (BCS) were treated with non-targeting siRNA (WT) or siRNA targeting both cathepsins X and L ("XL" when given to WT, or "BCSXL" when given to BCS) and stimulated with media control (-), silica (80  $\mu$ g/mL), nigericin (1.5  $\mu$ M), or dAdT (0.5  $\mu$ g/mL). XL and BCSXL macrophages were also treated with K777 (XL+K777 and BCSXL+K777; white bars; 15  $\mu$ M). Knockdown (siXL) was verified by (B) cathepsin X (CtsX) and L (CtsL) expression analysis by qPCR; data are normalized to GAPDH expression and plotted relative to non-targeting siRNA (NT), and (C) Labeling of cathepsin activity with BMV109 in live cells, as done in "A"; dashed boxes highlight upregulation of cathepsins B & S for siXL and cathepsin X for BCS<sup>-/-</sup> treated with NT; m.w. markers are on the right in kDa. (D-G) TNF- $\alpha$  was measured in supernatants. Error bars represent (A,D-F) range bars of technical duplicates (G) S.E. of means of either five (WT, XL, BCS, BCSXL) or three (+K777) independent experiments. Statistical analysis was performed by (A,D-F) Two-way ANOVA and Sidak's multiple comparisons test or (G) Two-tailed Student's t-test; \*P<0.05, \*\*P<0.01, \*\*\*P<0.001, \*\*\*\*P<0.0001. All data are representative of at least three independent experiments.

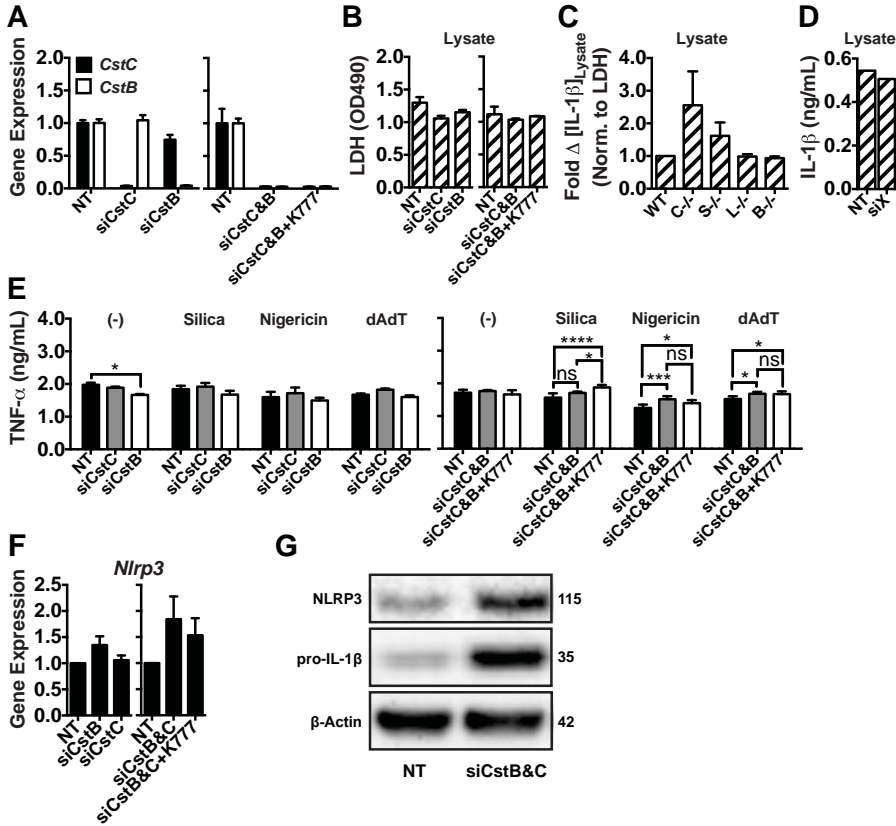

### Supplemental Figure 3

#### Supplemental Figure 3

In all experiments, PMs were LPS-primed and treated with media control or K777 (+K777; white bars; 15  $\mu$  M) prior to stimulation or analysis. **(A,B,E,F,G)** PMs were transfected with non-targeting (NT), cystatin C (siCstC), cystatin B (siCstB), or both cystatin C and B (siCstC&B) siRNA. **(A)** Cystatin C (CstC; black bars) or cystatin B (CstB; white bars) expression was analyzed by qPCR; data are normalized to GAPDH expression and plotted relative to non-targeting (NT) siRNA. **(B)** After priming, PMs were treated with media control for 6h and LDH (OD490; hatched bars) was measured in the lysates with a plate reader. **(E)** PMs were stimulated with media control (-), silica (80  $\mu$ g/mL), nigericin (1.5  $\mu$ M) or dAdT (0.5  $\mu$ g/mL) and TNF- $\alpha$  was measured in supernatants. **(C)** LPS-primed PMs from WT mice or mice deficient in either cathepsin C (C-/-), S (S-/-), L (L-/-), or B (B-/-) were treated with media for 6h after LPS priming and IL-1 $\beta$  (hatched bars) was measured in lysates by ELISA; data are normalized to LDH (OD490), measured with a plate reader, and plotted as fold-change in IL-1 $\beta$  relative to WT controls. **(D)** PMs were transfected with NT siRNA or siRNA targeting cathepsin X (siX), then primed with LPS, treated with media for 6h, and IL-1 $\beta$  (hatched bars) was measured in lysates by ELISA. **(F)** *Nlrp3* expression was analyzed by qPCR; data are normalized to GAPDH expression and plotted relative to non-targeting (NT) siRNA. **(G)** Lysates were processed by SDS-PAGE and analyzed for pro-IL-1 $\beta$ , NLRP3 and  $\beta$ -Actin by western blot; m.w. markers are on the right in kDa. Error bars represent **(A)** S.D. of technical triplicates, **(B)** range bars of technical duplicates, **(C)** S.E. of means from three (C-/- and S-/-) or twelve (L-/- and B-/-) independent experiments, **(E)** S.D. of technical quadruplicates, or **(F)** S.E. of averages from three (siCstB, siCstB, siCstB&C+K777) or four (siCstB&C) independent experiments. Statistical analysis was performed by **(E)** Two-way or **(F)** One-way ANOVA and Dunnett's multiple comparisons test; \*P<0.05, \*\*P<0.01, \*\*\*P<0.001, \*\*\*\*P<0.0001. Data are representative of at least three or **(G)** two independent experiments.

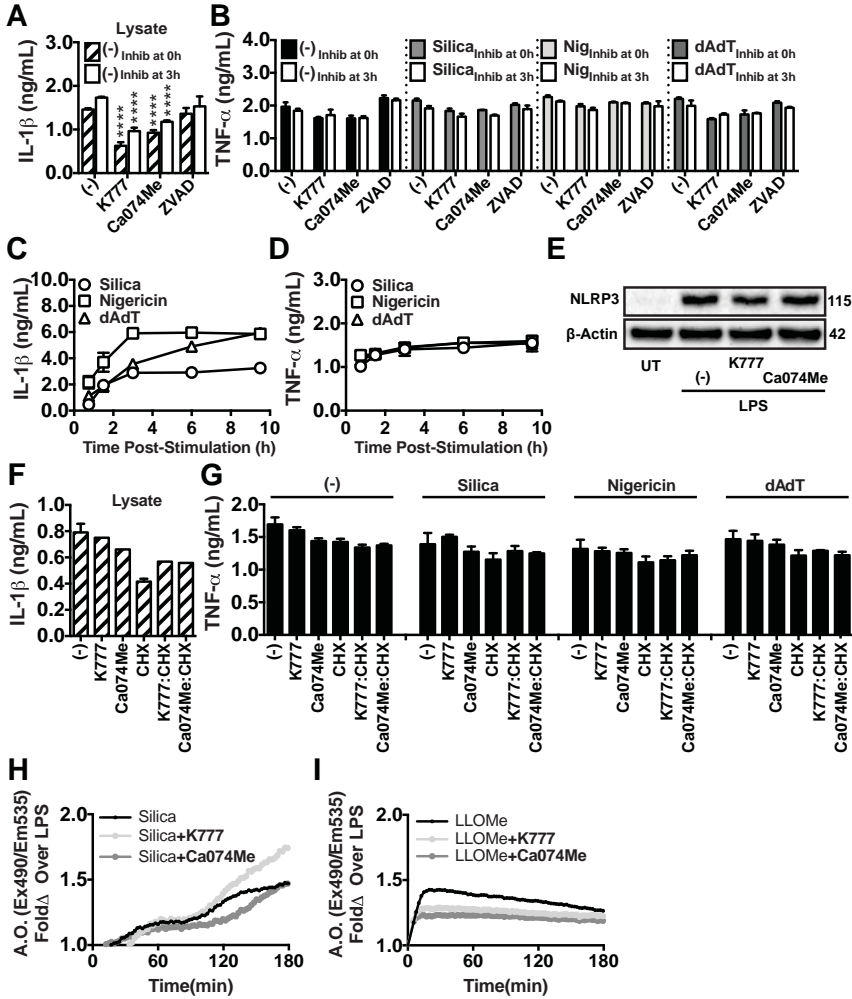

## Supplemental Figure 4

### Supplemental Figure 4

(A,B) LPS-primed PMs were treated with media control (-), K777 (15  $\mu$ M), Ca074Me (15  $\mu$ M), or ZVAD (10  $\mu$ M), which were added at the same time as LPS (Inhib at 0h; hatched or filled bars) or 3h after LPS (Inhib at 3h; white bars) prior to stimulation with media control (-), silica (80  $\mu$ g/mL), nigericin (1.5  $\mu$ M) or dAdT (0.5  $\mu$ g/mL) for an additional 6h. (A) IL-1 $\beta$  was measured in lysates, or (B) TNF- $\alpha$  was measured in supernatants by ELISA. (C,D) LPS-primed PMs were stimulated with silica (40  $\mu$ g/mL; circle), nigericin (2  $\mu$ M; square) or dAdT (0.3  $\mu$ g/mL; triangle); IL-1 $\beta$  & TNF- $\alpha$  were measured in supernatants after 0.75, 1.5, 3, 6, or 9h of stimulation. (E) PMs were either untreated (UT) or LPS-primed (indicated by bar) before treatment 2h later with media control (-), K777 (15  $\mu$ M) or Ca074Me (15  $\mu$ M) for 1h, as in the Standard Protocol, then cells were treated with media for 4h; lysates were processed by SDS-PAGE and then analyzed for NLRP3 and  $\beta$ -Actin by western blot; m.w. markers are on the right. (F,G) PMs were primed with LPS for 5.5h and treated with either media control (-), K777 (15  $\mu$ M), Ca074Me (15  $\mu$ M), CHX (1  $\mu$ M), K777 combined with CHX, or Ca074Me combined with CHX for another 0.5h, and then treated with media control (-), silica (80  $\mu$ g/mL), nigericin (1.5  $\mu$ M), or dAdT (0.5  $\mu$ g/mL) for another 3h. (F) IL-1 $\beta$  (hatched bars) was measured in lysates, or (G) TNF- $\alpha$  (filled bars) was measured in supernatants by ELISA. (H,I) PMs stained with acridine orange (A.O.; increasing values = disruption of lysosomes/pH gradient) were primed with LPS before treatment 2h later with media control, K777 (15  $\mu$ M) or Ca074Me (15  $\mu$ M) for 1h prior to stimulation with (H) silica (80  $\mu$ g/mL) or (I) LLOMe (1.25 mM); fluorescence traces were monitored by plate reader at short intervals; traces indicate fold change over LPS-treated samples. Error bars represent (A,B) S.D. of technical triplicates (-), (B) duplicates (silica, nigericin, dAdT), (C,D) S.D. of technical duplicates, (F) S.D. of technical triplicates, (G) S.D. of technical triplicates (media or CHX), duplicates (K777 & Ca074Me  $\pm$ CHX), sextuplicates (silica, nigericin, dAdT  $\pm$ CHX), or triplicates (silica, nigericin, dAdT with K777 & Ca074Me  $\pm$ CHX). Statistical analysis was performed by (A) Two-way ANOVA and Dunnett's multiple comparisons test; \*\*\*\*P<0.0001. Data are representative of (A-D) at least three independent experiments, or (E-I) two independent experiments.
